# Supplementary material for: Economically viable N-doped graphene aerogel for the photodegradation of structurally different dyes and a plant-model-based environmental assessment
Source: Royal Society of Chemistry journal article supplement (doi:10.1039/d3en00752a), 2024-01-01
Supplement: d3en00752a1.pdf [file d3en00752a1.pdf]

### Supplementary Information

## **Economically Viable N-doped Graphene Aerogel for the Photodegradation of Structurally Different Dyes and a Plant- model based Environmental Assessment**

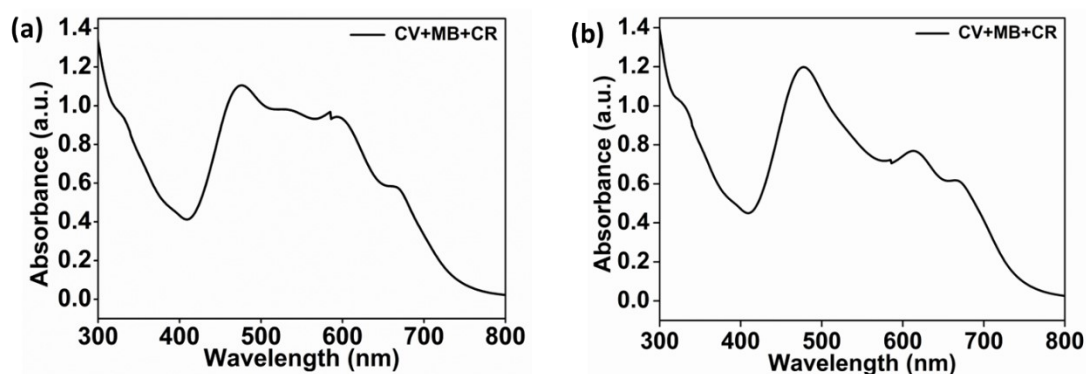

**Figure S1.** UV- visible absorption spectrum of mixture of dyes (CV + MB + CR): (a) 5, 10, 20 mg L<sup>-1</sup>; (b) 12.5, 62.5, and 50 mg L<sup>-1</sup> for CV, MB, and CR, respectively.

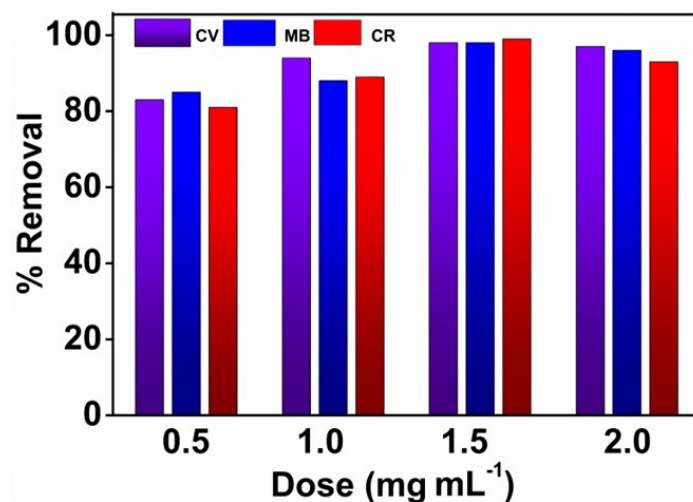

**Figure S2.** Bar graph showing dye degradation from the mixture of dyes (CV + MB + CR) at various N-GA doses.

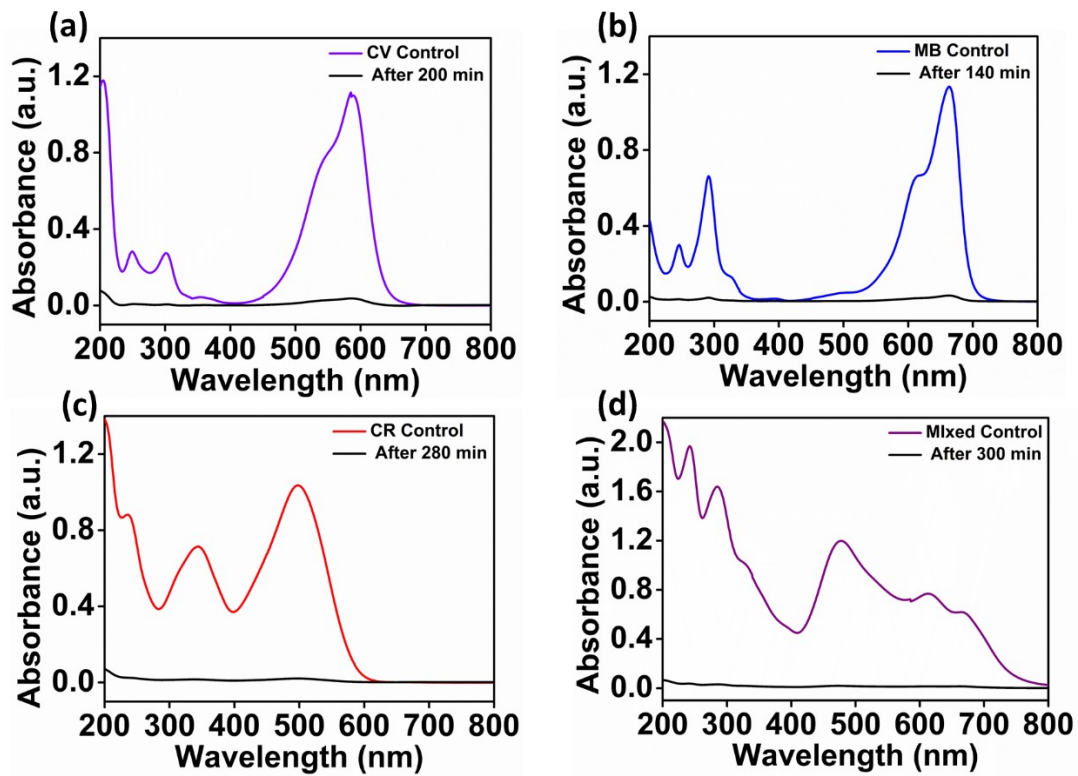

**Figure S3.** UV- Visible absorption spectra showing photocatalytic degradation of (a) CV, (b) MB, (c) CR, and (d) mixture of dyes (CV + MB + CR).
